# Supplementary material for: Proliferation‐associated long noncoding RNA, TMPO‐AS1, is a potential therapeutic target for triple‐negative breast cancer
Source: PubMed Central journal article supplement — Cancer Sci. 2020 Jun 13;111(7):2440–50. doi: 10.1111/cas.14498 (PMC7385350; doi:10.1111/cas.14498), 2020-06-13
Supplement: CAS-111-2440-s001.pdf [file CAS-111-2440-s001.pdf]

## Supporting Information

### **Proliferation-associated long noncoding RNA, *TMPO-AS1*, is a potential therapeutic target for triple-negative breast cancer**

Yuichi Mitobe | Kazuhiro Ikeda | Wataru Sato | Yukinobu Kodama | Mitsuru Naito |  
Noriko Gotoh | Kanjiro Miyata | Kazunori Kataoka | Hitoshi Sasaki |  
Kuniko Horie-Inoue | Satoshi Inoue

**Table S1.** Primers used in the present study.

**Table S2.** *TMPO-AS1* coexpressed genes in breast cancer.

**Figure S1.** *TMPO-AS1* overexpression promotes cell proliferation.

**Figure S2.** *TMPO-AS1* overexpression increases E2F-associated gene expression.

**Figure S3.** *TMPO-AS1* overexpression promotes cell migration.

**Table S1. Primers used in the present study**

| Gene name       | Forward (5' to 3')      | Reverse (5' to 3')       |
|-----------------|-------------------------|--------------------------|
| <i>GAPDH</i>    | ggtggtctcctctgacttcaaca | gtggtcgttgagggcaaagtg    |
| <i>TMPO-AS1</i> | cttttgtgcgccgtttcct     | cccagagacgaaagctgctt     |
| <i>MCM6</i>     | tcgggccttgaaaacattcgt   | tgtgtctggttaggcaggtctt   |
| <i>TMPO</i>     | cggtcctgacaaaagacaagttg | ccggcagcgtcacattg        |
| <i>MAD2L1</i>   | ggactcaccttgcttgtaactac | gatcactgaacggatttcacct   |
| <i>CHEK1</i>    | ccagatgctcagagattcttcca | tgttcaacaaacgctcacgatta  |
| <i>TGFBR1</i>   | acggcgttacagtgtttctg    | gcacatacaaacggcctatctc   |
| <i>TGFBR2</i>   | gtagctctgatgagtgcaatgac | cagatatggcaactcccagtg    |
| <i>rRNA</i>     | gcttaatttgactcaacacggga | agctatcaatctgtcaatcctgtc |

**Table S2. TMPO-AS1 coexpressed genes in breast cancer**

| Correlated Gene | Spearman's Correlation | <i>p</i> -value |
|-----------------|------------------------|-----------------|
| TMPO            | 0.675040008            | 1.29E-109       |
| NUSAP1          | 0.655626446            | 2.08E-101       |
| TROAP           | 0.650623855            | 2.17E-99        |
| OIP5            | 0.644886186            | 4.01E-97        |
| PRC1            | 0.644358911            | 6.44E-97        |
| KIFC1           | 0.638498114            | 1.18E-94        |
| TYMS            | 0.638236951            | 1.48E-94        |
| ESPL1           | 0.637709963            | 2.35E-94        |
| RFC5            | 0.633629499            | 8.18E-93        |
| E2F1            | 0.63202859             | 3.25E-92        |
| CDCA3           | 0.631710578            | 4.27E-92        |
| SPC25           | 0.627805809            | 1.18E-90        |
| PARPBP          | 0.627018336            | 2.30E-90        |
| ZWINT           | 0.626918729            | 2.50E-90        |
| FOXM1           | 0.626184534            | 4.64E-90        |
| RAD54L          | 0.625175791            | 1.08E-89        |
| ASF1B           | 0.624758916            | 1.53E-89        |
| TCF19           | 0.623618859            | 3.97E-89        |
| CCNB2           | 0.62246223             | 1.04E-88        |
| NCAPG           | 0.621738415            | 1.89E-88        |
| CDC25C          | 0.620064097            | 7.50E-88        |
| KIF18B          | 0.61990519             | 8.54E-88        |
| KNTC1           | 0.617235359            | 7.57E-87        |
| KIF11           | 0.616189623            | 1.77E-86        |
| HMGB2           | 0.614971066            | 4.74E-86        |
| ARHGEF39        | 0.614842011            | 5.26E-86        |
| FANCI           | 0.6146186              | 6.30E-86        |
| UHRF1           | 0.613101281            | 2.13E-85        |
| NEIL3           | 0.611815216            | 5.96E-85        |
| CIT             | 0.610960565            | 1.18E-84        |

**Table S2** (continued)

|          |             |          |
|----------|-------------|----------|
| CDK1     | 0.610937478 | 1.20E-84 |
| LMNB1    | 0.610829818 | 1.31E-84 |
| UBE2C    | 0.606302397 | 4.63E-83 |
| HJURP    | 0.605238046 | 1.06E-82 |
| TPX2     | 0.60363935  | 3.68E-82 |
| SKA1     | 0.603540472 | 3.97E-82 |
| CENPA    | 0.602618835 | 8.11E-82 |
| RAD51AP1 | 0.602391375 | 9.66E-82 |
| BUB1B    | 0.601901492 | 1.41E-81 |
| CDCA5    | 0.601395221 | 2.08E-81 |
| TACC3    | 0.601231544 | 2.36E-81 |
| KIF23    | 0.600707096 | 3.53E-81 |
| KIF4A    | 0.59794837  | 2.89E-80 |
| RAD51    | 0.59740897  | 4.36E-80 |
| NDC80    | 0.596651434 | 7.73E-80 |
| E2F7     | 0.595901911 | 1.36E-79 |
| AURKB    | 0.595774473 | 1.50E-79 |
| GTSE1    | 0.594930946 | 2.83E-79 |
| TIMELESS | 0.594258336 | 4.68E-79 |
| ZNF367   | 0.59374272  | 6.89E-79 |
| PLK1     | 0.592859579 | 1.33E-78 |
| CENPK    | 0.592267902 | 2.07E-78 |
| CENPU    | 0.590961886 | 5.46E-78 |
| DEPDC1B  | 0.590060524 | 1.06E-77 |
| POLQ     | 0.588344442 | 3.76E-77 |
| SGO1     | 0.58729735  | 8.11E-77 |
| PTTG1    | 0.58698299  | 1.02E-76 |
| BIRC5    | 0.586132778 | 1.90E-76 |
| MAD2L1   | 0.58573888  | 2.53E-76 |
| CDC25A   | 0.584845579 | 4.84E-76 |
| BLM      | 0.583233211 | 1.55E-75 |

**Table S2** (continued)

|           |             |          |
|-----------|-------------|----------|
| MCM2      | 0.583128569 | 1.67E-75 |
| TICRR     | 0.5825484   | 2.54E-75 |
| CCNA2     | 0.582243484 | 3.16E-75 |
| AURKA     | 0.582033074 | 3.68E-75 |
| CDC45     | 0.581381965 | 5.87E-75 |
| MELK      | 0.581047764 | 7.46E-75 |
| UBE2T     | 0.580482392 | 1.12E-74 |
| NCAPH     | 0.57996404  | 1.62E-74 |
| EZH2      | 0.579903591 | 1.69E-74 |
| PCLAF     | 0.578109171 | 6.05E-74 |
| H2AFZ     | 0.576897505 | 1.42E-73 |
| CCNB1     | 0.576877827 | 1.44E-73 |
| MND1      | 0.57661162  | 1.74E-73 |
| CEP55     | 0.576572911 | 1.79E-73 |
| KIF15     | 0.57559076  | 3.57E-73 |
| WDR62     | 0.574928851 | 5.69E-73 |
| E2F2      | 0.574761264 | 6.40E-73 |
| PIMREG    | 0.574655209 | 6.89E-73 |
| CDCA8     | 0.574226658 | 9.30E-73 |
| CDKN3     | 0.573908999 | 1.16E-72 |
| ARHGAP11A | 0.573846806 | 1.21E-72 |
| KIF2C     | 0.572835081 | 2.45E-72 |
| KIF18A    | 0.572434027 | 3.24E-72 |
| RACGAP1   | 0.572209437 | 3.79E-72 |
| DLGAP5    | 0.570829787 | 9.86E-72 |
| BUB1      | 0.569791758 | 2.02E-71 |
| MKI67     | 0.569292489 | 2.84E-71 |
| DNAJC9    | 0.566039992 | 2.63E-70 |
| MCM10     | 0.565608923 | 3.52E-70 |
| PBK       | 0.565385195 | 4.10E-70 |
| FAM72B    | 0.564818895 | 6.01E-70 |

**Table S2** (continued)

|          |             |          |
|----------|-------------|----------|
| PLK4     | 0.563838016 | 1.17E-69 |
| PCNA     | 0.563468177 | 1.50E-69 |
| FEN1     | 0.562055818 | 3.87E-69 |
| FANCA    | 0.561515734 | 5.55E-69 |
| KNSTRN   | 0.561279858 | 6.50E-69 |
| DTL      | 0.560677581 | 9.73E-69 |
| WDR76    | 0.559259612 | 2.50E-68 |
| KIF20A   | 0.558944537 | 3.08E-68 |
| NUF2     | 0.55810782  | 5.36E-68 |
| CENPM    | 0.557887691 | 6.21E-68 |
| ORC1     | 0.555790388 | 2.47E-67 |
| RMI2     | 0.555144867 | 3.77E-67 |
| CDT1     | 0.555035211 | 4.05E-67 |
| C17ORF53 | 0.553486741 | 1.11E-66 |
| MYBL2    | 0.55305293  | 1.48E-66 |
| CKAP2L   | 0.552924745 | 1.61E-66 |
| HMMR     | 0.551764185 | 3.41E-66 |
| STIL     | 0.550397587 | 8.25E-66 |
| TRIP13   | 0.550297318 | 8.80E-66 |
| TOP2A    | 0.550276248 | 8.92E-66 |
| PIF1     | 0.549585278 | 1.39E-65 |
| CDC7     | 0.549544173 | 1.43E-65 |
| PKMYT1   | 0.549416275 | 1.55E-65 |
| HELLS    | 0.549379458 | 1.59E-65 |
| RFC4     | 0.548999606 | 2.03E-65 |
| POLA2    | 0.54864301  | 2.55E-65 |
| CHAF1B   | 0.547993358 | 3.86E-65 |
| GIN51    | 0.547262255 | 6.15E-65 |
| IQGAP3   | 0.547035369 | 7.11E-65 |
| DSN1     | 0.546231272 | 1.19E-64 |
| CENPE    | 0.545674049 | 1.69E-64 |

**Table S2** (continued)

|         |             |          |
|---------|-------------|----------|
| SPAG5   | 0.544589221 | 3.36E-64 |
| SKA3    | 0.543392176 | 7.15E-64 |
| TTK     | 0.543380779 | 7.20E-64 |
| HASPIN  | 0.543200626 | 8.06E-64 |
| CENPO   | 0.543041653 | 8.91E-64 |
| ERCC6L  | 0.54293785  | 9.51E-64 |
| EXO1    | 0.542901136 | 9.73E-64 |
| DEPDC1  | 0.541072889 | 3.06E-63 |
| NCAPG2  | 0.540260576 | 5.08E-63 |
| RRM2    | 0.538455312 | 1.56E-62 |
| ORC6    | 0.53647588  | 5.29E-62 |
| MCM3    | 0.53369096  | 2.91E-61 |
| CIP2A   | 0.532772562 | 5.08E-61 |
| SPC24   | 0.53231475  | 6.71E-61 |
| E2F8    | 0.531806607 | 9.13E-61 |
| CDC20   | 0.531262371 | 1.27E-60 |
| KIF14   | 0.53003403  | 2.66E-60 |
| GINS2   | 0.529389127 | 3.92E-60 |
| CDC6    | 0.526793495 | 1.85E-59 |
| CENPH   | 0.526776762 | 1.87E-59 |
| FAM72A  | 0.524984999 | 5.42E-59 |
| ASPM    | 0.523815709 | 1.08E-58 |
| NEK2    | 0.522586065 | 2.23E-58 |
| CENPN   | 0.522088628 | 2.98E-58 |
| POLE    | 0.520815078 | 6.28E-58 |
| DBF4    | 0.519864509 | 1.09E-57 |
| FAM111B | 0.519819255 | 1.12E-57 |
| MTFR2   | 0.518491222 | 2.43E-57 |
| CENPI   | 0.518088257 | 3.06E-57 |
| KIF4B   | 0.518004484 | 3.22E-57 |
| POC1A   | 0.51727942  | 4.89E-57 |

**Table S2** (continued)

|           |             |          |
|-----------|-------------|----------|
| CCNE2     | 0.517270851 | 4.91E-57 |
| FAM83D    | 0.516259347 | 8.80E-57 |
| MCM7      | 0.515342393 | 1.49E-56 |
| TK1       | 0.513940104 | 3.32E-56 |
| EME1      | 0.512464031 | 7.69E-56 |
| TUBA1B    | 0.511825662 | 1.10E-55 |
| FAM72D    | 0.510570112 | 2.25E-55 |
| UBE2S     | 0.510207266 | 2.76E-55 |
| CENPF     | 0.510152272 | 2.84E-55 |
| TYMSOS    | 0.509081088 | 5.19E-55 |
| PSRC1     | 0.508712179 | 6.38E-55 |
| STMN1     | 0.507763769 | 1.09E-54 |
| DNA2      | 0.507077035 | 1.59E-54 |
| CHEK1     | 0.506500841 | 2.20E-54 |
| TEDC2     | 0.506332857 | 2.41E-54 |
| CDCA2     | 0.505613893 | 3.59E-54 |
| PSMC3IP   | 0.504491505 | 6.69E-54 |
| UNG       | 0.504174509 | 7.97E-54 |
| ANLN      | 0.50384075  | 9.58E-54 |
| MCM6      | 0.502887862 | 1.62E-53 |
| CKS2      | 0.502101213 | 2.50E-53 |
| RNASEH2A  | 0.500747888 | 5.23E-53 |
| DSCC1     | 0.50038237  | 6.39E-53 |
| CDK2      | 0.499570458 | 9.94E-53 |
| CCDC150   | 0.499238474 | 1.19E-52 |
| SUV39H1   | 0.49857609  | 1.71E-52 |
| RAN       | 0.498096499 | 2.21E-52 |
| POLE2     | 0.497729213 | 2.70E-52 |
| ARHGAP11B | 0.496184894 | 6.20E-52 |
| CHAF1A    | 0.495852877 | 7.42E-52 |
| CLSPN     | 0.495721688 | 7.96E-52 |



**Table S2** (continued)

|        |             |          |
|--------|-------------|----------|
| TRAIP  | 0.495430982 | 9.30E-52 |
| WDHD1  | 0.495125661 | 1.10E-51 |
| GIN53  | 0.494997144 | 1.17E-51 |
| CCNE1  | 0.492983612 | 3.44E-51 |
| PTTG3P | 0.492168092 | 5.30E-51 |
| ATAD2  | 0.492075823 | 5.57E-51 |
| LRR1   | 0.491842929 | 6.30E-51 |
| DONSON | 0.490980349 | 9.95E-51 |
| SMC4   | 0.490176606 | 1.52E-50 |
| FANCD2 | 0.489505863 | 2.17E-50 |
| NUP37  | 0.487232934 | 7.13E-50 |
| SGO2   | 0.486101991 | 1.28E-49 |
| AUNIP  | 0.484636714 | 2.75E-49 |
| RFC2   | 0.484274575 | 3.31E-49 |
| DIAPH3 | 0.483933594 | 3.95E-49 |
| FBXO43 | 0.483421056 | 5.15E-49 |
| CCNF   | 0.482907638 | 6.71E-49 |
| CNIH2  | 0.482400072 | 8.71E-49 |
| DDX12P | 0.482083785 | 1.02E-48 |
| FANCG  | 0.481610839 | 1.31E-48 |
| CENPW  | 0.478044021 | 8.04E-48 |
| NCAPD2 | 0.477127859 | 1.28E-47 |
| SHCBP1 | 0.476749752 | 1.55E-47 |
| ZGRF1  | 0.476476949 | 1.77E-47 |
| FBXO5  | 0.476355544 | 1.89E-47 |
| FANCB  | 0.474132139 | 5.75E-47 |
| SPDL1  | 0.473828598 | 6.70E-47 |
| GEN1   | 0.473431862 | 8.16E-47 |
| SLBP   | 0.472125975 | 1.56E-46 |
| CENPL  | 0.470758207 | 3.08E-46 |
| ESCO2  | 0.470748953 | 3.09E-46 |

**Table S2** (continued)

|           |             |          |
|-----------|-------------|----------|
| DDIAS     | 0.47059305  | 3.34E-46 |
| GPSM2     | 0.469556523 | 5.57E-46 |
| C5ORF34   | 0.46949168  | 5.75E-46 |
| CEP152    | 0.46942082  | 5.96E-46 |
| PRIM1     | 0.467564613 | 1.48E-45 |
| NSD2      | 0.467051518 | 1.90E-45 |
| KPNA2     | 0.466898839 | 2.05E-45 |
| NRM       | 0.466194967 | 2.89E-45 |
| LIG1      | 0.46558803  | 3.88E-45 |
| RAD54B    | 0.464573589 | 6.35E-45 |
| MIS18A    | 0.464315385 | 7.20E-45 |
| CENPQ     | 0.462319521 | 1.88E-44 |
| VRK1      | 0.46099702  | 3.55E-44 |
| BRIP1     | 0.460480841 | 4.55E-44 |
| C21ORF58  | 0.460460699 | 4.59E-44 |
| GIN54     | 0.459754773 | 6.43E-44 |
| SNRPA1    | 0.458479809 | 1.18E-43 |
| RTKN2     | 0.456797695 | 2.62E-43 |
| KNL1      | 0.456783494 | 2.63E-43 |
| XRCC2     | 0.456764258 | 2.66E-43 |
| KIF20B    | 0.45657209  | 2.91E-43 |
| CCDC59    | 0.455442428 | 4.95E-43 |
| RNFT2     | 0.455411331 | 5.03E-43 |
| RECQL4    | 0.45476581  | 6.80E-43 |
| TONSL     | 0.452863391 | 1.66E-42 |
| GMNN      | 0.45199582  | 2.48E-42 |
| NEMP1     | 0.450610383 | 4.71E-42 |
| H2AFX     | 0.450532509 | 4.88E-42 |
| HNRNPA2B1 | 0.450144153 | 5.84E-42 |
| RACGAP1P  | 0.448478516 | 1.26E-41 |
| FIGNL1    | 0.448333139 | 1.35E-41 |

**Table S2** (continued)

|           |             |          |
|-----------|-------------|----------|
| RDM1      | 0.447807955 | 1.71E-41 |
| SAPCD2    | 0.446725263 | 2.81E-41 |
| MCM5      | 0.44589283  | 4.10E-41 |
| ATAD5     | 0.444777104 | 6.81E-41 |
| MASTL     | 0.443236736 | 1.37E-40 |
| CCDC18    | 0.441866958 | 2.53E-40 |
| CABLES2   | 0.441247564 | 3.35E-40 |
| HAUS8     | 0.440838758 | 4.02E-40 |
| C12ORF73  | 0.439747945 | 6.54E-40 |
| CKS1B     | 0.439707859 | 6.66E-40 |
| C4ORF46   | 0.439313254 | 7.94E-40 |
| LINC00634 | 0.438878221 | 9.64E-40 |
| KIF22     | 0.437975986 | 1.44E-39 |
| LOC399815 | 0.437052607 | 2.17E-39 |
| RHNO1     | 0.435651776 | 4.02E-39 |
| APOBEC3B  | 0.435108288 | 5.10E-39 |
| ECT2      | 0.434017356 | 8.23E-39 |
| TCHP      | 0.431430553 | 2.54E-38 |
| SNRPD1    | 0.431355064 | 2.62E-38 |
| ZWILCH    | 0.430426131 | 3.92E-38 |
| MTBP      | 0.429836583 | 5.06E-38 |
| RCCD1     | 0.429518152 | 5.81E-38 |
| RIBC2     | 0.428769667 | 8.01E-38 |
| RHEBL1    | 0.427726064 | 1.25E-37 |
| LOC642846 | 0.427135751 | 1.61E-37 |
| TMEM106C  | 0.426816097 | 1.85E-37 |
| PRIM2     | 0.42675333  | 1.90E-37 |
| GAS2L3    | 0.425086887 | 3.87E-37 |
| DDX11     | 0.424093945 | 5.89E-37 |
| SNRPF     | 0.423543458 | 7.43E-37 |
| EXOSC9    | 0.423341299 | 8.09E-37 |

**Table S2** (continued)

|          |             |          |
|----------|-------------|----------|
| MIR924HG | 0.422700495 | 1.06E-36 |
| CMC2     | 0.422181454 | 1.32E-36 |
| KMT5A    | 0.422151087 | 1.34E-36 |
| PRR11    | 0.421346552 | 1.87E-36 |
| HNRNPL   | 0.420515816 | 2.65E-36 |
| SRSF2    | 0.420304169 | 2.90E-36 |
| SRSF9    | 0.420107054 | 3.15E-36 |
| DHFR     | 0.419649504 | 3.81E-36 |
| MCM4     | 0.418074727 | 7.33E-36 |
| C2ORF48  | 0.414968496 | 2.64E-35 |
| ANAPC7   | 0.414909491 | 2.71E-35 |
| ZNF695   | 0.414290795 | 3.49E-35 |
| INCENP   | 0.411770779 | 9.74E-35 |
| CDCA4    | 0.411764706 | 9.77E-35 |
| KDM2B    | 0.411651097 | 1.02E-34 |
| TOPBP1   | 0.410246216 | 1.81E-34 |
| MRGBP    | 0.408737859 | 3.32E-34 |
| ALYREF   | 0.407996    | 4.47E-34 |
| EBP      | 0.406567496 | 7.91E-34 |
| DDX39A   | 0.404457272 | 1.83E-33 |
| NASP     | 0.403761906 | 2.41E-33 |
| KCNG3    | 0.40364354  | 2.52E-33 |
| CDC25B   | 0.403590342 | 2.58E-33 |
| GPR19    | 0.403428321 | 2.75E-33 |
| TUBB     | 0.401715618 | 5.39E-33 |
| NUDT1    | 0.400848224 | 7.58E-33 |
| SKA2     | 0.400743957 | 7.89E-33 |

---

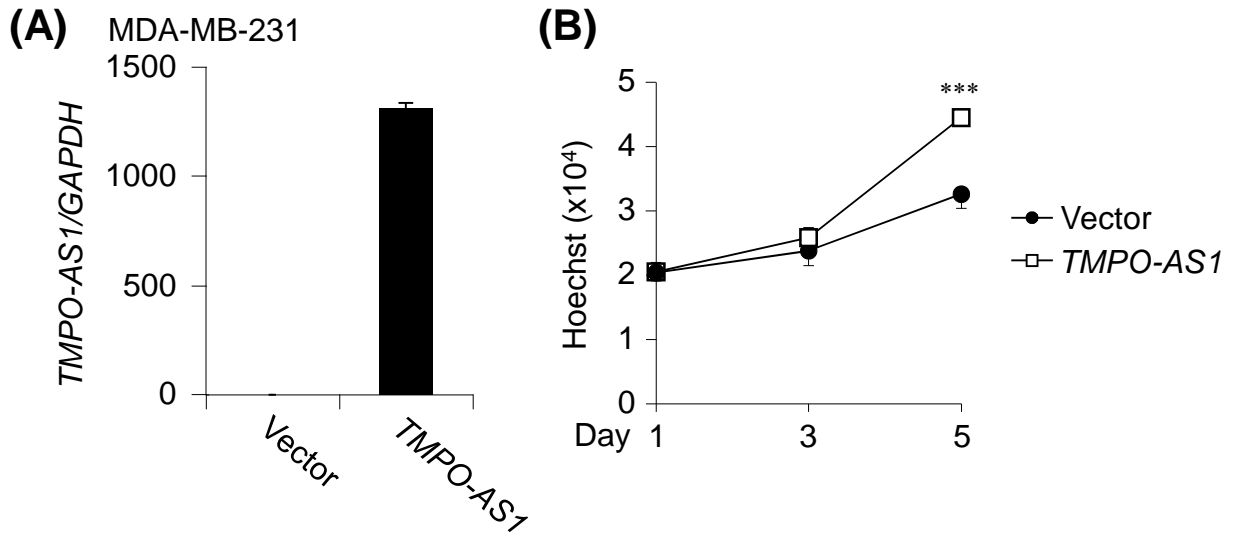

**FIGURE S1.** *TMPO-AS1* overexpression promotes cell proliferation. A, Expression levels of *TMPO-AS1* in *TMPO-AS1*- and control vector-transfected MDA-MB-231 cells. Data are normalized to *GAPDH* and presented as mean fold change  $\pm$  SD versus Vector ( $n = 3$ ). B, Growth of the *TMPO-AS1*- and control vector-transfected MDA-MB-231 cells was measured by DNA assay. Data are presented as mean  $\pm$  SD ( $n = 5$ ). \*\*\*,  $P < 0.001$ .

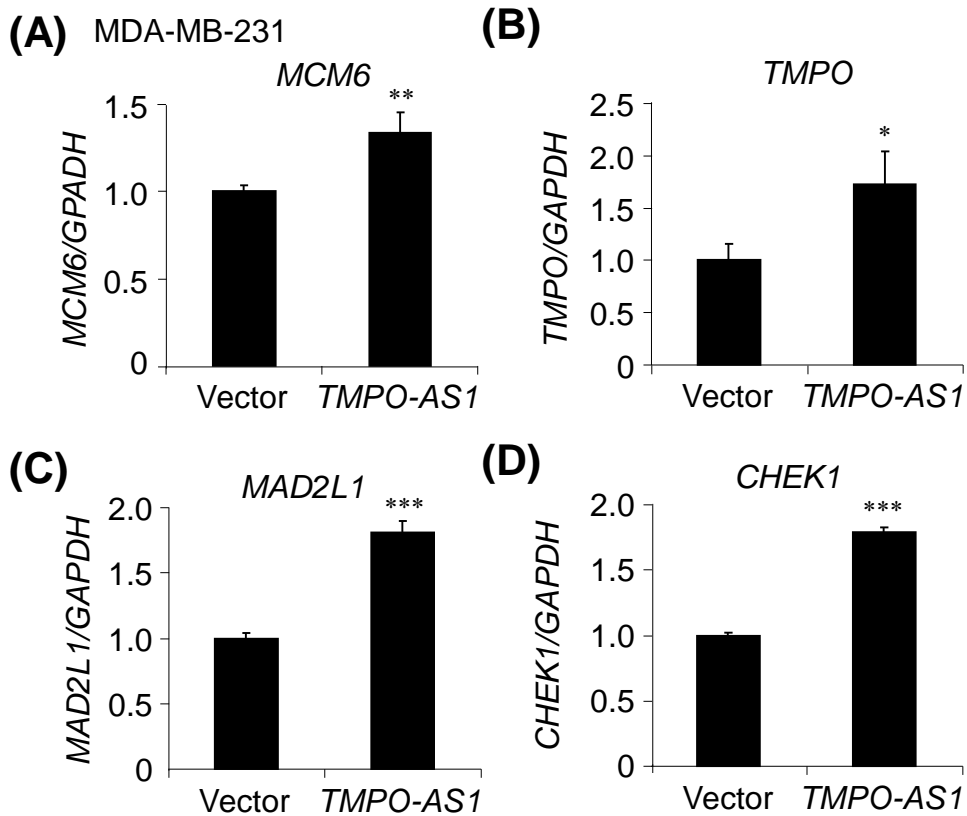

**FIGURE S2.** *TMPO-AS1* overexpression increases E2F-associated gene expression. A-D, Expression levels of *MCM6* (A), *TMPO* (B), *MAD2L1* (C), and *CHEK1* (D) mRNAs in *TMPO-AS1*- and control vector-transfected MDA-MB-231 cells. Data are normalized to *GAPDH* and presented as mean fold change  $\pm$  SD versus Vector ( $n = 3$ ). . \*,  $P < 0.05$ ; \*\*,  $P < 0.01$ ; \*\*\*,  $P < 0.001$ .

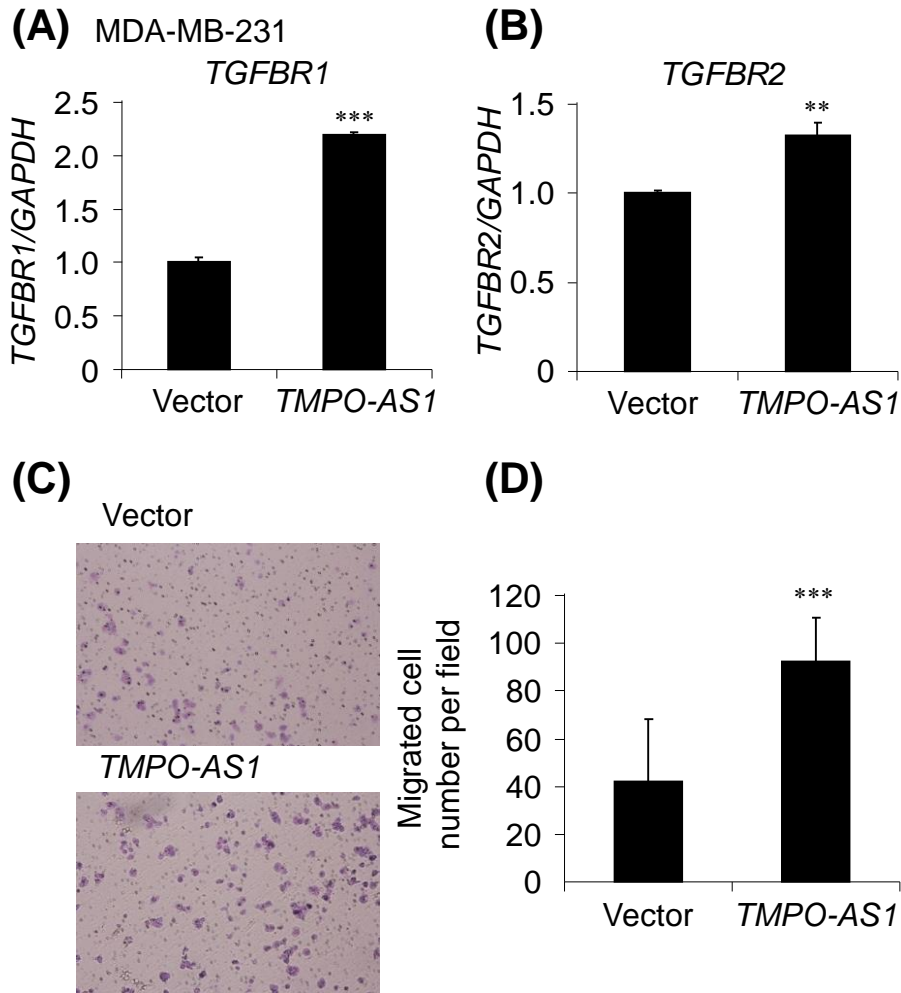

**FIGURE S3.** *TMPO-AS1* overexpression promotes cell migration. A and B, Expression levels of *TGFBR1* (A) and *TGFBR2* (B) mRNAs in *TMPO-AS1*- and control vector-transfected MDA-MB-231 cells. Data are normalized to *GAPDH* and presented as mean fold change  $\pm$  SD versus Vector ( $n = 3$ ). C and D, *TMPO-AS1*- and control vector-transfected MDA-MB-231 cells were seeded onto the transwell membrane. Migrating cells were stained with Giemsa and counted under a microscope in 8 independent fields. Representative photograph of migrating cells (C) is shown. The number of migrating cells are presented as mean  $\pm$  SD ( $n = 5$ ). \*\*,  $p < 0.01$ ; \*\*\*,  $p < 0.001$ .
